# Supplementary figures and images for: Hydration of tricalcium aluminate (C3A) in the presence and absence of gypsum—studied by Raman spectroscopy and X-ray diffraction
Source: Royal Society of Chemistry journal article supplement (doi:10.1039/b509904h), 2006-01-01

More detailed views of Fig. 3, 7a and 10a:

Fig. 3

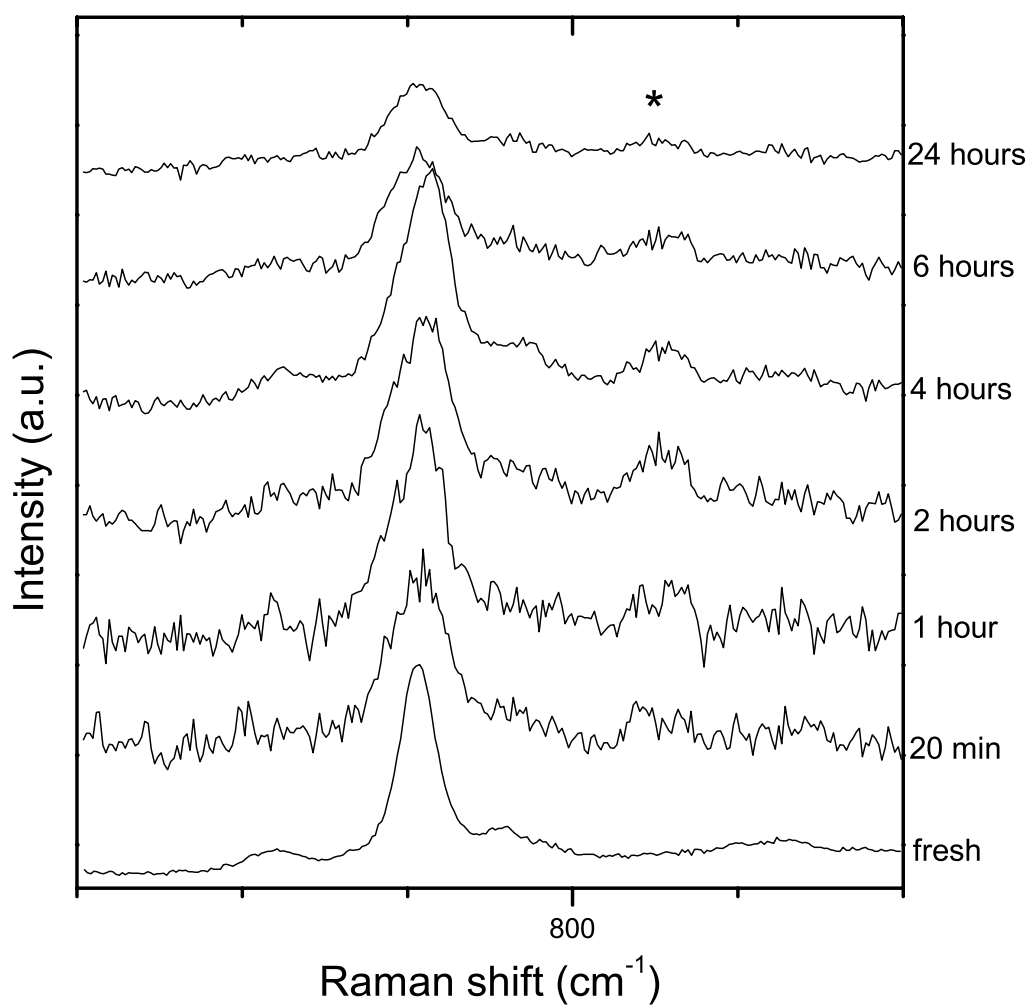

Fig. 7a

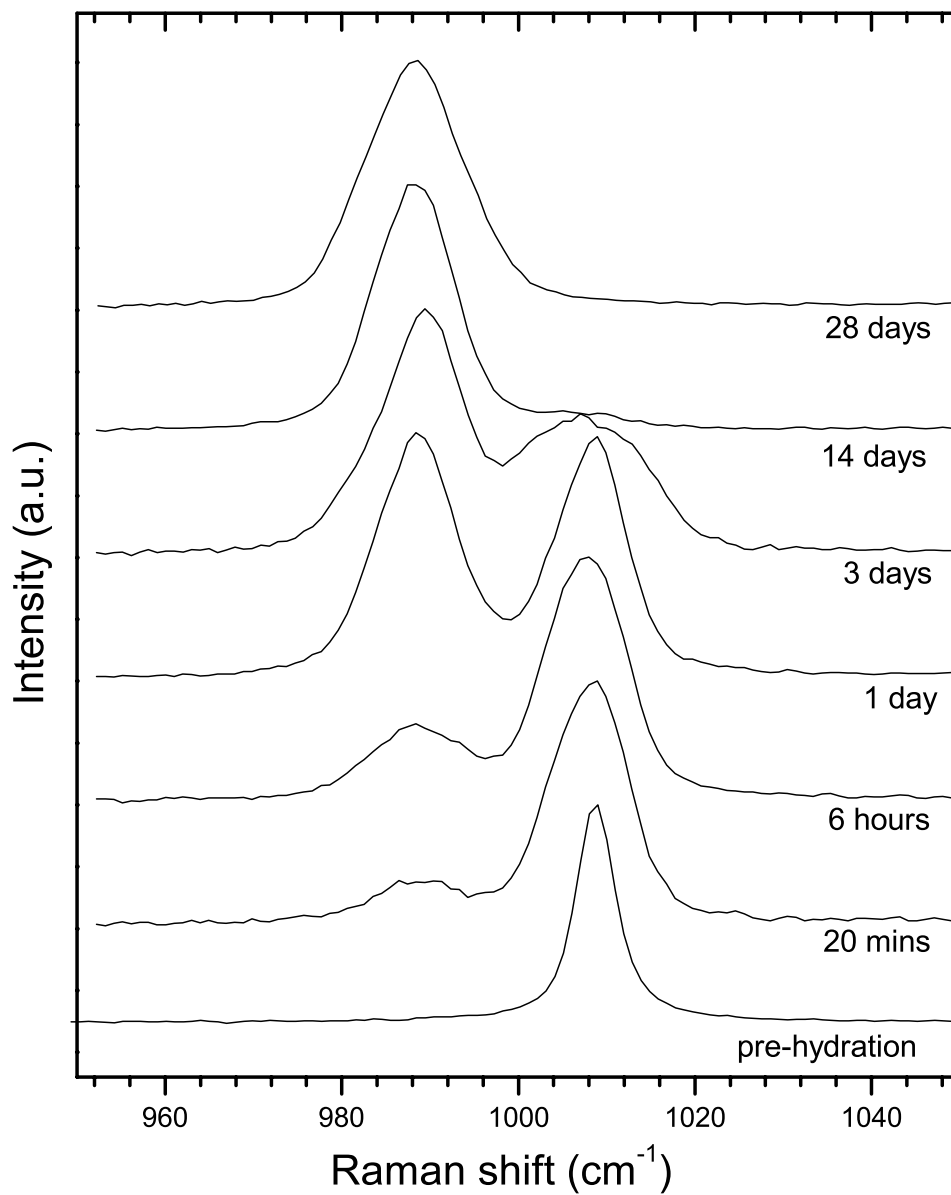

Fig. 10a

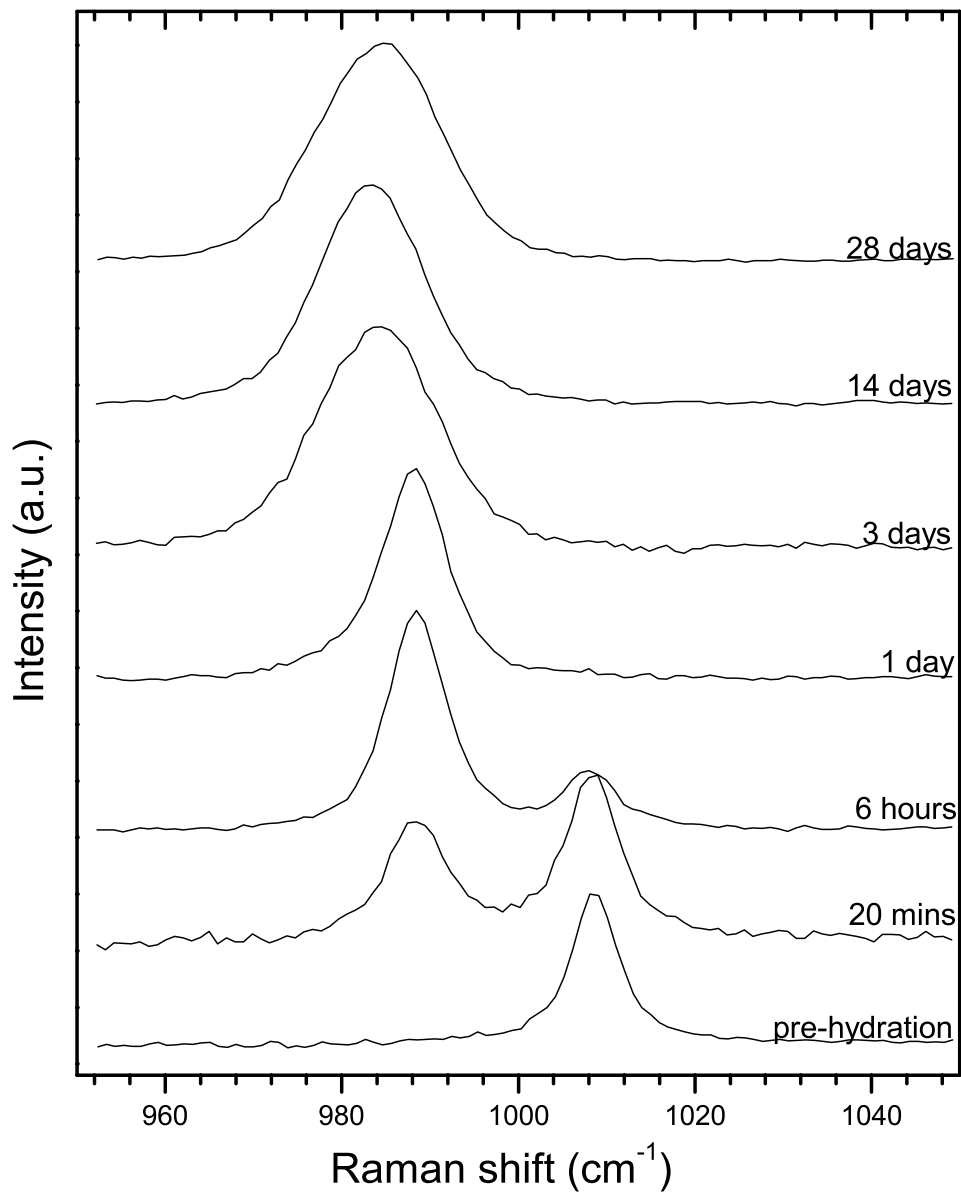

Supplement: b509904h.pdf [file b509904h.pdf]
